# Supplementary material for: Parent-Endorsed Sex Differences in Toddlers with and Without ASD: Utilizing the M-CHAT
Source: Springer Nature journal article supplement (doi:10.1007/s10803-016-2945-8), 2016-10-18
Supplement: MOESM1 [file 10902898]

| Supplementary Table 1: Non-ASD M vs F and ASD M vs F without controlling for severity | | | | | | | | | | | | | | | | |
| --- | --- | --- | --- | --- | --- | --- | --- | --- | --- | --- | --- | --- | --- | --- | --- | --- |
|  |  | |  | |  | |  |  |  |  |  |  |  |  |  |  |
|  | (2a) Main effect sex*1 | | | | | | (2b) Main effect sex*2 | | |
|  | (β) | | S.E. | | P α | | (β) | S.E. | P |
| 1.Enjoy being swung/bounced | | 0.3 | | 0.1 | | .021 | -0.04 | 1.1 | .967 |
| **2. Interest in other children** | | -0.4 | | 0.1 | | .007 | 0.3 | 0.8 | .690 |
| 3.Enjoy climbing on things | | 0.4 | | 0.1 | | <.001* | 1.3 | 0.5 | .015* |
| 4.Enjoy peek-a-boo | | -0.3 | | 0.1 | | .028 | 1.6 | 0.8 | .051 |
| 5.Pretend play | | -0.9 | | 0.06 | | <.001* | 1.2 | 0.4 | .006* |
| 6.Point to ask for something | | -0.05 | | 0.04 | | .252 | 0.6 | 0.4 | .149 |
| **7.Point to indicate interest** | | -0.02 | | 0.04 | | .660 | 0.3 | 0.4 | .473 |
| 8.Functional play with objects | | .115 | | 0.1 | | .178 | 1.4 | 0.5 | .003* |
| **9.Show objects to others** | | -0.3 | | 0.1 | | <.001* | 1.3 | 0.4 | .002* |
| 10.Eye contact | | -0.3 | | 0.1 | | <.001* | 0.06 | 0.8 | .936 |
| 11.Oversensitive to noise | | -0.05 | | 0.02 | | .039 | 0.3 | 0.5 | .549 |
| 12.Response to smile | | -0.1 | | 0.2 | | .658 | 0.9 | 1.2 | .473 |
| **13.Imitation** | | -0.5 | | 0.03 | | <.001* | 1.4 | 0.4 | .001* |
| **14.Repsonse to name** | | -0.3 | | 0.1 | | .025 | 0.8 | 0.7 | .285 |
| **15.Follow to point** | | -0.4 | | 0.04 | | <.001* | 0.08 | 0.5 | .859 |
| 16. Walk unaided | | 0.0 | | 0.05 | | .879 | 1.1 | 0.4 | .011* |
| 17.Look at things you are looking at | | -0.2 | | 0.06 | | .002* | 1.0 | 0.5 | .031* |
| 18.Unusual finger/hand movements | | 0.03 | | 0.03 | | .353 | 0.2 | 0.5 | .779 |
| 19.Attract attention to play/activity | | -0.1 | | 0.05 | | .044 | 1.0 | 0.5 | .028* |
| 20.Suspected deafness | | -0.3 | | 0.1 | | <.001* | 1.3 | 0.7 | .064 |
| 21.Understand speech | | -0.4 | | 0.1 | | <.001* | 1.3 | 0.5 | .011* |
| 22.Stare at nothing | | -0.04 | | 0.02 | | .062 | 0.6 | 0.4 | .124 |
| 23 Check parents reaction | | -0.1 | | 0.2 | | .001* | 0.6 | 0.5 | .210 |

1 Main effect of sex in non-ASD without controlling for #item failed on M-CHAT, 2 Main effect of sex in ASD without controlling for #item failed on M-CHAT
* Significant, α P<.00217, **Bold** item refer to Robins et al. 2001 six critical items.

β values: Positive beta values have a higher likelihood of failure for ASD/Females. Negative values express lower likelihood of failure.
